# Supplementary material
Source: PubMed Central journal article supplement (PMC3855057)
Supplement: NIHMS490832-supplement-1.pdf [file NIHMS490832-supplement-1.pdf]

**Table S1. *Saccharomyces cerevisiae* Strains Used in These Studies, Related to Figures 1 and 4**

| <b>Name</b>                   | <b>Relevant genotype</b>                                                       |
|-------------------------------|--------------------------------------------------------------------------------|
| <b>Microarray experiments</b> |                                                                                |
| BY4741                        | <i>MATa his3Δ1 leu2Δ0 met15Δ0 ura3Δ0</i>                                       |
| RDKY7796, RDKY7797            | BY4741 <i>sml1::HPH<sup>a</sup></i>                                            |
| RDKY8051, RDK8052             | BY4741 <i>ste11::KanMX4<sup>b</sup></i>                                        |
| RDKY7798, RDKY7799            | BY4741 <i>ste11::KanMX4 sml1::HPH<sup>a</sup></i>                              |
| RDKY7804, RDKY7805            | BY4741 <i>rfx1::KanMX4 sml1::HPH<sup>a</sup></i>                               |
| RDKY7802, RDKY7803            | BY4741 <i>chk1::KanMX4 sml1::HPH<sup>a</sup></i>                               |
| RDKY7800, RDKY7801            | BY4741 <i>dun1::KanMX4 sml1::HPH<sup>a</sup></i>                               |
| RDKY7813 <sup>c</sup>         | BY4741 <i>rad53::KanMX4 sml1::HPH</i>                                          |
| RDKY7814 <sup>c</sup>         | BY4741 <i>rad53::KanMX4 sml1::HPH</i>                                          |
| RDKY7807                      | RKDY7803 <i>chk1::KanMX4 dun1::natNT2 sml1::HPH</i>                            |
| RDKY7808                      | RKDY7802 <i>chk1::KanMX4 dun1::natNT2 sml1::HPH</i>                            |
| RDKY7809                      | RKDY7802 <i>chk1::KanMX4 rad53::natNT2 sml1::HPH</i>                           |
| RDKY7810                      | RKDY7803 <i>chk1::KanMX4 rad53::natNT2 sml1::HPH</i>                           |
| RDKY7811                      | RKDY7800 <i>dun1::KanMX4 rad53::natNT2 sml1::HPH</i>                           |
| RDKY7812                      | RKDY7801 <i>dun1::KanMX4 rad53::natNT2 sml1::HPH</i>                           |
| RDKY7806, RDKY7835            | BY4741 <i>tel1::KanMX4 sml1::HPH<sup>a</sup></i>                               |
| RDKY7815 <sup>c</sup>         | BY4741 <i>mec1::KanMX4 sml1::HPH</i>                                           |
| RDKY7816 <sup>c</sup>         | BY4741 <i>mec1::KanMX4 sml1::HPH</i>                                           |
| NA <sup>d</sup>               | RDKY7815 <i>mec1::KanMX4 tel1::natNT2 sml1::HPH</i>                            |
| NA <sup>d</sup>               | RDKY7816 <i>mec1::KanMX4 tel1::natNT2 sml1::HPH</i>                            |
| RDKY7978, RDKY7979            | BY4741 <i>hap1::KanMX4</i>                                                     |
| RDKY7976, RDKY7977            | BY4741 <i>hap4::KanMX4<sup>b</sup></i>                                         |
| RDKY7970, RDKY7971            | BY4741 <i>rcs1::KanMX4<sup>b</sup></i>                                         |
| RDKY7972, RDKY7973            | BY4741 <i>sut1::KanMX4<sup>b</sup></i>                                         |
| RDKY7974, RDKY7975            | BY4741 <i>yap7::KanMX4<sup>d</sup></i>                                         |
| <b>Mass Spec. experiments</b> |                                                                                |
| SCY251 <sup>e</sup>           | <i>MATa ura3-52 his3Δ200 leu2Δ1 trp1Δ63 lys2ΔBgl ade2Δ1 hom3-10 ade8 arg4Δ</i> |
| RDKY7855                      | SCY251 <i>sml1::HPH</i>                                                        |
| RDKY7856                      | RDKY7855 <i>rad53::natNT2</i>                                                  |
| RDKY7857                      | SCY251 <i>SWI6-TAP:kanMX4</i>                                                  |
| RDKY7858, RDKY7859            | RDKY7857 <i>SWI6-TAP:kanMX4 sml1::HPH2</i>                                     |
| RDKY7860                      | RDKY7858 <i>SWI6-TAP:kanMX4 sml1::HPH2 rad53::natNT2</i>                       |
| RDKY7879                      | RDKY7859 <i>SWI6-TAP:kanMX4 sml1::HPH2 rad53::natNT2</i>                       |
| RDKY7861, RDKY7862            | RDKY7855 <i>GCN4-TAP:KanMX4</i>                                                |
| RDKY7863, RDKY7864            | RDKY7856 <i>rad53::natNT2 GCN4-TAP:KanMX4</i>                                  |
| RDKY7865                      | RDKY7855 <i>NDD1-TAP:KanMX4</i>                                                |

---

|                  |                                              |
|------------------|----------------------------------------------|
| RDY7866          | RDY7856 <i>rad53::natNT2 NDD1-TAP:KanMX4</i> |
| RDY7867, RDY7868 | RDY7855 <i>MCM1-TAP:KanMX4</i>               |
| RDY7869, RDY7870 | RDY7856 <i>rad53::natNT2 MCM1-TAP:KanMX4</i> |
| RDY7871, RDY7872 | RDY7855 <i>MSN4-TAP:KanMX4</i>               |
| RDY7873, RDY7874 | RDY7856 <i>rad53::natNT2 MSN4-TAP:KanMX4</i> |
| RDY7875, RDY7876 | RDY7855 <i>FKH2-TAP:KanMX4</i>               |
| RDY7877, RDY7878 | RDY7856 <i>rad53::natNT2 FKH2-TAP:KanMX4</i> |

---

<sup>a</sup>These strains were constructed from BY4741 or the corresponding *STE1*, *RFX1*, *CHK1*, *DUN1* or *TEL1* gene deletion mutants derived from BY4741 from the Yeast Knockout Collection (Open Biosystems) by deleting *SML1* as indicated.

<sup>b</sup>*STE11*, *HAP4*, *RCS1*, *SUT1*, and *YAP7* gene deletion strains from the Yeast Knockout Collection (Open Biosystems) were streaked out, and two isolated colonies were selected for the studies here.

<sup>c</sup>These strains are *rad53Δ* and *mec1Δ* mutants from our laboratory collection, constructed by Dr. Christopher Putnam (Ludwig Institute San Diego Branch).

<sup>d</sup>NA, not available because strains were made freshly for each experiment and were not saved. Since deleting *TEL1* in the indicated *mec1Δ* strain results in extreme genome instability, the double mutant strain was used with minimal passaging.

<sup>e</sup>SCY251 was provided by Drs. Sheng-hong Chen and Huilin Zhou (Ludwig Institute San Diego Branch) and was constructed by deleting *ARG4* in the S288c strain RDY3023 (also known as RDY2672), which is *MATa ura3-52 his3Δ200 leu2Δ1 trp1Δ63 lys2ΔBgl ade2Δ1 ade8* (Tishkoff et al., 1997).

---

**Table S3. Summary of Genes Showing Significant Differences for Each Comparison in Table S2, Related to Figure 2**

| Comparison (Kinases)                | UP  | DOWN | TOTAL | Comparison (TFs)                          | UP  | DOWN | TOTAL |
|-------------------------------------|-----|------|-------|-------------------------------------------|-----|------|-------|
| <b>Differential Expression</b>      |     |      |       | <b>Differential Expression</b>            |     |      |       |
| BY4741.MMSvsNT <sup>a,b</sup>       | 897 | 759  | 1656  | WT.MMSvsNT <sup>a,b</sup>                 | 905 | 764  | 1669  |
| WT.MMSvsNT <sup>a,b</sup>           | 950 | 722  | 1672  | <i>sml1Δ</i> .MMSvsNT <sup>a,b</sup>      | 954 | 719  | 1673  |
| <i>ste11Δ</i> .MMSvsNT <sup>a</sup> | 937 | 690  | 1627  | <i>dun1Δ sml1Δ</i> .MMSvsNT <sup>a</sup>  | 687 | 486  | 1173  |
| <i>dun1Δ</i> .MMSvsNT <sup>a</sup>  | 677 | 476  | 1153  | <i>rad53Δ sml1Δ</i> .MMSvsNT <sup>a</sup> | 539 | 434  | 973   |
| <i>rad53Δ</i> .MMSvsNT <sup>a</sup> | 536 | 436  | 972   | <i>ste11Δ</i> .MMSvsNT <sup>a</sup>       | 940 | 694  | 1634  |
| <i>rfx1Δ</i> .MMSvsNT <sup>a</sup>  | 902 | 732  | 1634  | <i>rfx1Δ sml1Δ</i> .MMSvsNT <sup>a</sup>  | 905 | 749  | 1654  |
| <i>tel1Δ</i> .MMSvsNT               | 876 | 651  | 1527  | <i>sut1Δ</i> .MMSvsNT                     | 635 | 462  | 1097  |
| <i>chk1Δ</i> .MMSvsNT               | 935 | 649  | 1584  | <i>rsc1Δ</i> .MMSvsNT                     | 880 | 671  | 1551  |
| <i>chk1Δrad53Δ</i> .MMSvsNT         | 309 | 235  | 544   | <i>yap7Δ</i> .MMSvsNT                     | 802 | 591  | 1393  |
| <i>chk1Δdun1Δ</i> .MMSvsNT          | 649 | 482  | 1131  | <i>hap1Δ</i> .MMSvsNT                     | 848 | 614  | 1462  |
| <i>dun1Δrad53Δ</i> .MMSvsNT         | 494 | 410  | 904   | <i>hap4Δ</i> .MMSvsNT                     | 791 | 640  | 1431  |
| <i>tel1Δmec1Δ</i> .MMSvsNT          | 453 | 332  | 785   |                                           |     |      |       |
| <i>mec1Δ</i> .MMSvsNT               | 716 | 566  | 1282  |                                           |     |      |       |
| <b>effect of SML1 deletion</b>      |     |      |       | <b>effect of SML1 deletion</b>            |     |      |       |
| WTvsBY4741                          | 1   | 1    | 2     | <i>sml1Δ</i> vsWT                         | 1   | 0    | 1     |
| <b>mutant vs. WT</b>                |     |      |       | <b>mutant vs. WT</b>                      |     |      |       |
| <i>ste11Δ</i> vsWT                  | 8   | 10   | 18    | <i>ste11Δ</i> vsWT                        | 6   | 8    | 14    |
| <i>dun1Δ</i> vsWT                   | 6   | 109  | 115   | <i>rfx1Δ sml1Δ</i> vsWT                   | 16  | 45   | 61    |
| <i>rad53Δ</i> vsWT                  | 121 | 604  | 725   | <i>sut1Δ</i> vsWT                         | 22  | 215  | 237   |
| <i>rfx1Δ</i> vsWT                   | 31  | 41   | 72    | <i>rsc1Δ</i> vsWT                         | 29  | 36   | 65    |
| <i>tel1Δ</i> vsWT                   | 8   | 27   | 35    | <i>yap7Δ</i> vsWT                         | 13  | 36   | 49    |
| <i>chk1Δ</i> vsWT                   | 2   | 2    | 4     | <i>hap1Δ</i> vsWT                         | 25  | 60   | 85    |
| <i>chk1Δrad53Δ</i> vsWT             | 24  | 479  | 503   | <i>hap4Δ</i> vsWT                         | 28  | 114  | 142   |
| <i>dun1Δrad53Δ</i> vsWT             | 77  | 463  | 540   |                                           |     |      |       |
| <i>tel1Δmec1Δ</i> vsWT              | 47  | 459  | 506   |                                           |     |      |       |
| <i>mec1Δ</i> vsWT                   | 33  | 146  | 179   |                                           |     |      |       |
| <i>chk1Δdun1Δ</i> vsWT              | 10  | 98   | 108   |                                           |     |      |       |
| <b>other comparisons</b>            |     |      |       |                                           |     |      |       |
| <i>tel1Δmec1Δ</i> vs <i>rad53Δ</i>  | 39  | 19   | 58    |                                           |     |      |       |
| <i>tel1Δmec1Δ</i> vs <i>mec1Δ</i>   | 50  | 143  | 193   |                                           |     |      |       |
| <i>dun1Δrad53Δ</i> vs <i>rad53Δ</i> | 9   | 1    | 10    |                                           |     |      |       |
| <i>chk1Δrad53Δ</i> vs <i>rad53Δ</i> | 15  | 6    | 21    |                                           |     |      |       |
| <i>chk1Δdun1Δ</i> vs <i>dun1Δ</i>   | 16  | 11   | 27    |                                           |     |      |       |

Shown are the total numbers of genes showing significant differences for each comparison. Yellow cells indicate upregulated genes, and blue cells indicate downregulated genes. Red cells indicate genes that show a significant decrease in differential expression in the mutant relative to wild-type and are, thus, checkpoint kinase-dependent genes, while green cells indicate genes that show an increase in differential expression in the mutant (shown in Figure 2B). The

checkpoint kinase mutant analysis is detailed in the left half of the table, while the transcription factor mutant analysis is presented on the right.

<sup>a</sup>The same microarray data was used for both sets of analyses for BY4741, *sml1Δ*, *ste11Δ*, *dun1Δ (sml1Δ)*, *rad53Δ (sml1Δ)*, and *rfx1Δ (sml1Δ)*.

<sup>b</sup>The wild-type (WT) sample for the kinase mutant analyses was *sml1Δ*, while BY4741 served as WT for the TF mutant analyses.

**Table S5. Overlap of Genes with Kinase-Dependent Differential Expression, Related to Figure 2**

|                                 | <i>chk1</i> Δ | <i>tel1</i> Δ | <i>rfx1</i> Δ | <i>dun1</i> Δ | <i>chk1</i> Δ<br><i>dun1</i> Δ | <i>mec1</i> Δ | <i>rad53</i> Δ | <i>chk1</i> Δ<br><i>rad53</i> Δ | <i>dun1</i> Δ<br><i>rad53</i> Δ | <i>tel1</i> Δ<br><i>mec1</i> Δ |
|---------------------------------|---------------|---------------|---------------|---------------|--------------------------------|---------------|----------------|---------------------------------|---------------------------------|--------------------------------|
| <i>chk1</i> Δ                   | 2/2           | 0/27          | 0/41          | 1/109         | 1/98                           | 1/146         | 1/604          | 1/479                           | 1/463                           | 1/459                          |
| <i>tel1</i> Δ                   | 0/2           | 27/27         | 8/41          | 13/109        | 9/98                           | 13/146        | 21/604         | 20/479                          | 20/463                          | 22/459                         |
| <i>rfx1</i> Δ                   | 0/2           | 8/27          | 41/41         | 16/109        | 17/98                          | 27/146        | 39/604         | 39/479                          | 40/463                          | 40/459                         |
| <i>dun1</i> Δ                   | 1/2           | 13/27         | 16/41         | 109/109       | 56/98                          | 58/146        | 96/604         | 100/479                         | 99/463                          | 97/459                         |
| <i>chk1</i> Δ<br><i>dun1</i> Δ  | 1/2           | 9/27          | 17/41         | 56/109        | 98/98                          | 45/146        | 88/604         | 90/479                          | 88/463                          | 87/459                         |
| <i>mec1</i> Δ                   | 1/2           | 13/27         | 27/41         | 58/109        | 45/98                          | 146/146       | 133/604        | 134/479                         | 131/463                         | 138/459                        |
| <i>rad53</i> Δ                  | 1/2           | 21/27         | 39/41         | 96/109        | 88/98                          | 133/146       | 604/604        | 402/479                         | 413/463                         | 368/459                        |
| <i>chk1</i> Δ<br><i>rad53</i> Δ | 1/2           | 20/27         | 39/41         | 100/109       | 90/98                          | 134/146       | 402/604        | 479/479                         | 377/463                         | 363/459                        |
| <i>dun1</i> Δ<br><i>rad53</i> Δ | 1/2           | 20/27         | 40/41         | 99/109        | 88/98                          | 131/146       | 413/604        | 377/479                         | 463/463                         | 348/459                        |
| <i>tel1</i> Δ<br><i>mec1</i> Δ  | 1/2           | 22/27         | 40/41         | 97/109        | 87/98                          | 138/146       | 368/604        | 363/479                         | 348/463                         | 459/459                        |

The numerator contains the total number of genes with reduced differential expression in both mutant strains, while the denominator contains the number of genes with reduced differential expression in the mutant in the top row.
